# Supplementary material for: Variations and Mutual Relations of Vegetation–Soil–Microbes of Alpine Meadow in the Qinghai-Tibet Plateau under Degradation and Cultivation
Source: MDPI journal article supplement (doi:10.3390/land11030396), 2022-03-08
Supplement: s1 [file s1]

# Variations and Mutual Relations of Vegetation– Soil–Microbes of Alpine Meadow in the Qinghai-Tibet Plateau under Degradation and Cultivation

Yueju Zhang <sup>a</sup>

Mingjun Ding <sup>a, b</sup>

Hua Zhang <sup>a, b\*</sup>

Nengyu Wang <sup>a</sup>

Fan Xiao <sup>a</sup>

Ziping Yu <sup>a</sup>

Peng Huang <sup>a</sup>

Fu Zou <sup>a</sup>

<sup>a</sup> Key Laboratory of Poyang Lake Wetland and Watershed Research, Ministry of Education/School of Geography and Environment, Jiangxi Normal University, Nanchang 330022, China

<sup>b</sup> Jiangxi Provincial Key Laboratory of Poyang Lake Comprehensive Management and Resource Development, Jiangxi Normal University, Nanchang 330022, China

*\*Corresponding author*

*Hua Zhang*

*Key Laboratory of Poyang Lake Wetland and Watershed Research, Ministry of Education/School of Geography and Environment, Jiangxi Normal University*

*No. 99, Ziyang Road,*

*NanChang 330022, China*

Tel: +86791 8812 0440

Fax: + 86791 8812 0440

Email: dingmj@jxnu.edu.cn

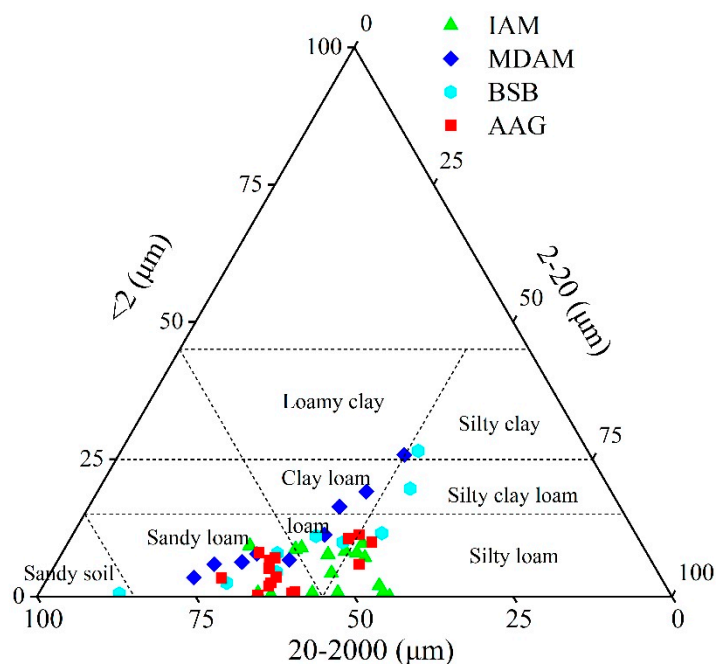

Figure S1. Soil texture triangle coordinates of different groups of the alpine meadow based on international soil classification system

Table S1. Basic information of the alpine meadow under degradation and cultivation

| Groups                                          | Altitude (m) | Plots/Quadrats | Slope (°) | Dominant species<br>(Frequency (%), Importance value)                                                                                                                                     |
|-------------------------------------------------|--------------|----------------|-----------|-------------------------------------------------------------------------------------------------------------------------------------------------------------------------------------------|
| <b>Intact Alpine meadow (IAM)</b>               | 4112.9±147.0 | 6/18           | 2-15      | <i>Kobresia humilis</i> (100, 0.28), <i>Poa pratensis</i> L. (58, 0.13), <i>Astragalus membranaceus</i> (Fisch.) Bge. (42, 0.20)                                                          |
| <b>Moderately degraded alpine meadow (MDAM)</b> | 4217.2±36.6  | 3/9            | 3-20      | <i>Artemisia frigida</i> Willd. (88, 0.11), <i>Leontopodium leontopodioides</i> (Willd.) Beauv. (56, 0.14), <i>Kobresia humilis</i> (78, 0.10), <i>Androsace tapete</i> Maxim. (56, 0.12) |
| <b>Black soil beach (BSB)</b>                   | 4122.1±109.4 | 3/9            | 0-22      | <i>Artemisia frigida</i> Willd. (72, 0.16), <i>Poa pratensis</i> L. (56, 0.10), <i>Potentilla anserina</i> L. (44, 0.20)                                                                  |
| <b>Artificial alpine grassland (AAG)</b>        | 3990.7±52.7  | 5/15           | 0         | <i>Elymus nutans</i> Griseb. (100, 0.35), <i>Poa pratensis</i> L. (100, 0.19), <i>Puccinellia tenuiflora</i> (Griseb.) Scribn. et Merr. (67, 0.21)                                        |
